# Supplementary material for: A theoretical study of hydrogen and chlorine transfer reactions from fluorine- and chlorine-substituted methanes by F3C˙ radicalsElectronic supplementary information (ESI) available: Vibrational frequencies, partition functions, hindered rotational barriers, imaginary frequencies, electronic charge distributions, polarity variation and reaction enthalpies for reactants, transition structures and products. See http://www.rsc.org/suppdata/cp/b1/b110897b/
Source: Royal Society of Chemistry journal article supplement (doi:10.1039/b110897b), 2002-06-07
Supplement: tables.pdf [file tables.pdf]

**TABLE 1S:** Vibrational frequencies computed at the <sup>a</sup>B3LYP/6-31G(*d*) and <sup>b</sup>MP2/6-31G(*d,p*) levels of theory for reactants, transition structures and products involved in the H- and Cl-transfer reactions: F<sub>3</sub>C + CX<sub>4-n</sub>H<sub>n</sub> (*n* = 1, 2 or 3; X = Cl or F) and F<sub>3</sub>C + CCl<sub>4-n</sub>H<sub>n</sub> (*n* = 1, 2 or 3). Experimental values are given in italics.

| Species                                             | Frequencies (cm <sup>-1</sup> ) |             |             |             |             |             |             |             |             |     |      |      |      |      |      |      |      |      |      |      |      |  |
|-----------------------------------------------------|---------------------------------|-------------|-------------|-------------|-------------|-------------|-------------|-------------|-------------|-----|------|------|------|------|------|------|------|------|------|------|------|--|
| <sup>c</sup> CF <sub>3</sub> H                      | 487                             | 487         | 681         | 1127        | 1160        | 1160        | 1404        | 1404        | 3084        |     |      |      |      |      |      |      |      |      |      |      |      |  |
|                                                     | 479                             | 479         | 667         | 1111        | 1158        | 1158        | 1392        | 1392        | 3084        |     |      |      |      |      |      |      |      |      |      |      |      |  |
|                                                     | <i>508</i>                      | <i>508</i>  | <i>700</i>  | <i>1137</i> | <i>1152</i> | <i>1152</i> | <i>1376</i> | <i>1376</i> | <i>3035</i> |     |      |      |      |      |      |      |      |      |      |      |      |  |
| F <sub>3</sub> C- <sup>*</sup> HCF <sub>3</sub>     | 1708 <i>i</i>                   | 18          | 31          | 37          | 186         | 187         | 212         | 495         | 497         | 509 | 511  | 682  | 747  | 1038 | 1205 | 1232 | 1233 | 1241 | 1241 | 1497 | 1498 |  |
|                                                     | 2116 <i>i</i>                   | 21          | 29          | 29          | 184         | 184         | 215         | 476         | 476         | 491 | 491  | 658  | 722  | 1007 | 1188 | 1205 | 1205 | 1207 | 1207 | 1495 | 1495 |  |
| <sup>c</sup> F <sub>3</sub> C                       | 486                             | 486         | 676         | 1071        | 1256        | 1256        |             |             |             |     |      |      |      |      |      |      |      |      |      |      |      |  |
|                                                     | 477                             | 477         | 669         | 1068        | 1249        | 1249        |             |             |             |     |      |      |      |      |      |      |      |      |      |      |      |  |
|                                                     | <i>500</i>                      | <i>500</i>  | <i>701</i>  | <i>1090</i> | <i>1090</i> | <i>1259</i> |             |             |             |     |      |      |      |      |      |      |      |      |      |      |      |  |
| <sup>c</sup> CF <sub>2</sub> H <sub>2</sub>         | 509                             | 1108        | 1109        | 1172        | 1251        | 1473        | 1538        | 3001        | 3062        |     |      |      |      |      |      |      |      |      |      |      |      |  |
|                                                     | 497                             | 1096        | 1115        | 1150        | 1236        | 1460        | 1546        | 2999        | 3060        |     |      |      |      |      |      |      |      |      |      |      |      |  |
|                                                     | <i>529</i>                      | <i>1090</i> | <i>1116</i> | <i>1176</i> | <i>1262</i> | <i>1435</i> | <i>1435</i> | <i>2949</i> | <i>3013</i> |     |      |      |      |      |      |      |      |      |      |      |      |  |
| F <sub>3</sub> C- <sup>*</sup> HCF <sub>2</sub> H   | 1721 <i>i</i>                   | 15          | 30          | 57          | 184         | 189         | 406         | 491         | 498         | 529 | 710  | 1054 | 1142 | 1152 | 1190 | 1198 | 1226 | 1317 | 1480 | 1492 | 3023 |  |
|                                                     | 2154 <i>i</i>                   | 23          | 33          | 57          | 186         | 191         | 443         | 483         | 485         | 514 | 707  | 1055 | 1123 | 1139 | 1185 | 1198 | 1224 | 1312 | 1511 | 1546 | 3032 |  |
| <sup>d</sup> HF <sub>2</sub> C                      | 526                             | 1000        | 1163        | 1181        | 1347        | 3059        |             |             |             |     |      |      |      |      |      |      |      |      |      |      |      |  |
|                                                     | 514                             | 1041        | 1143        | 1171        | 1338        | 3070        |             |             |             |     |      |      |      |      |      |      |      |      |      |      |      |  |
|                                                     | -                               | <i>946</i>  | <i>1164</i> | <i>1173</i> | <i>1317</i> | -           |             |             |             |     |      |      |      |      |      |      |      |      |      |      |      |  |
| <sup>c</sup> CFH <sub>3</sub>                       | 1072                            | 1182        | 1182        | 1494        | 1494        | 1502        | 2979        | 3051        | 3051        |     |      |      |      |      |      |      |      |      |      |      |      |  |
|                                                     | 1057                            | 1166        | 1166        | 1477        | 1485        | 1485        | 2976        | 3075        | 3075        |     |      |      |      |      |      |      |      |      |      |      |      |  |
|                                                     | <i>1049</i>                     | <i>1182</i> | <i>1182</i> | <i>1464</i> | <i>1467</i> | <i>1467</i> | <i>2965</i> | <i>3006</i> | <i>3006</i> |     |      |      |      |      |      |      |      |      |      |      |      |  |
| F <sub>3</sub> C- <sup>*</sup> HCFH <sub>2</sub>    | 1766 <i>i</i>                   | 18          | 42          | 82          | 186         | 377         | 467         | 494         | 551         | 710 | 1073 | 1128 | 1184 | 1185 | 1214 | 1220 | 1433 | 1441 | 1497 | 3008 | 3102 |  |
|                                                     | 2193 <i>i</i>                   | 29          | 52          | 88          | 185         | 415         | 461         | 484         | 552         | 705 | 1073 | 1104 | 1169 | 1185 | 1203 | 1222 | 1451 | 1470 | 1534 | 3009 | 3116 |  |
| <sup>d</sup> H <sub>2</sub> FC                      | 602                             | 1162        | 1182        | 1478        | 3083        | 3225        |             |             |             |     |      |      |      |      |      |      |      |      |      |      |      |  |
|                                                     | 733                             | 1151        | 1156        | 1473        | 3078        | 3228        |             |             |             |     |      |      |      |      |      |      |      |      |      |      |      |  |
|                                                     | -                               | <i>1163</i> | <i>1170</i> | -           | -           | -           |             |             |             |     |      |      |      |      |      |      |      |      |      |      |      |  |
| <sup>c</sup> CCl <sub>3</sub> H                     | 256                             | 256         | 360         | 655         | 723         | 723         | 1240        | 1240        | 3142        |     |      |      |      |      |      |      |      |      |      |      |      |  |
|                                                     | 263                             | 263         | 367         | 668         | 783         | 783         | 1245        | 1245        | 3094        |     |      |      |      |      |      |      |      |      |      |      |      |  |
|                                                     | <i>261</i>                      | <i>261</i>  | <i>363</i>  | <i>680</i>  | <i>774</i>  | <i>774</i>  | <i>1220</i> | <i>1220</i> | <i>3034</i> |     |      |      |      |      |      |      |      |      |      |      |      |  |
| F <sub>3</sub> C- <sup>*</sup> HCCl <sub>3</sub>    | 1650 <i>i</i>                   | 5           | 47          | 49          | 156         | 156         | 172         | 266         | 266         | 397 | 493  | 495  | 630  | 749  | 756  | 756  | 1108 | 1223 | 1223 | 1435 | 1435 |  |
|                                                     | 1973 <i>i</i>                   | 10          | 54          | 54          | 157         | 157         | 176         | 273         | 273         | 407 | 482  | 482  | 643  | 752  | 817  | 818  | 1115 | 1211 | 1212 | 1451 | 1453 |  |
| F <sub>3</sub> C- <sup>*</sup> ClCCl <sub>2</sub> H | 407 <i>i</i>                    | 7           | 45          | 55          | 139         | 165         | 197         | 229         | 302         | 385 | 505  | 507  | 658  | 697  | 783  | 998  | 1063 | 1246 | 1278 | 1279 | 3152 |  |
| <sup>d</sup> HCl <sub>2</sub> C                     | 299                             | 470         | 741         | 861         | 1243        | 3185        |             |             |             |     |      |      |      |      |      |      |      |      |      |      |      |  |
|                                                     | 305                             | 539         | 761         | 899         | 1258        | 3162        |             |             |             |     |      |      |      |      |      |      |      |      |      |      |      |  |
|                                                     | -                               | -           | -           | <i>902</i>  | <i>1226</i> | -           |             |             |             |     |      |      |      |      |      |      |      |      |      |      |      |  |
| <sup>c</sup> CCl <sub>2</sub> H <sub>2</sub>        | 292                             | 694         | 702         | 895         | 1138        | 1285        | 1474        | 3083        | 3148        |     |      |      |      |      |      |      |      |      |      |      |      |  |
|                                                     | 299                             | 719         | 763         | 899         | 1149        | 1291        | 1457        | 3051        | 3123        |     |      |      |      |      |      |      |      |      |      |      |      |  |
|                                                     | <i>282</i>                      | <i>717</i>  | <i>758</i>  | <i>898</i>  | <i>1153</i> | <i>1268</i> | <i>1467</i> | <i>2999</i> | <i>3040</i> |     |      |      |      |      |      |      |      |      |      |      |      |  |
| F <sub>3</sub> C- <sup>*</sup> HCCl <sub>2</sub> H  | 1700 <i>i</i>                   | 5           | 47          | 62          | 160         | 164         | 296         | 394         | 493         | 495 | 686  | 735  | 758  | 977  | 1111 | 1213 | 1217 | 1231 | 1441 | 1454 | 3109 |  |
|                                                     | 2048 <i>i</i>                   | 4           | 38          | 55          | 160         | 164         | 302         | 402         | 482         | 486 | 692  | 748  | 816  | 985  | 1118 | 1202 | 1215 | 1236 | 1450 | 1452 | 3077 |  |
| F <sub>3</sub> C- <sup>*</sup> ClCClH <sub>2</sub>  | 431 <i>i</i>                    | 8           | 51          | 76          | 153         | 218         | 218         | 306         | 506         | 508 | 674  | 713  | 756  | 999  | 1069 | 1101 | 1267 | 1269 | 1428 | 3101 | 3213 |  |
|                                                     | 729 <i>i</i>                    | 11          | 52          | 80          | 171         | 245         | 247         | 335         | 498         | 499 | 669  | 743  | 782  | 983  | 1081 | 1138 | 1239 | 1241 | 1426 | 3063 | 3175 |  |
| <sup>d</sup> H <sub>2</sub> ClC                     | 136                             | 820         | 993         | 1411        | 3140        | 3285        |             |             |             |     |      |      |      |      |      |      |      |      |      |      |      |  |
|                                                     | 335                             | 841         | 1005        | 1429        | 3125        | 3271        |             |             |             |     |      |      |      |      |      |      |      |      |      |      |      |  |
|                                                     | <i>402</i>                      | <i>827</i>  | -           | <i>1356</i> | -           | -           |             |             |             |     |      |      |      |      |      |      |      |      |      |      |      |  |
| <sup>c</sup> CClH <sub>3</sub>                      | 707                             | 1025        | 1025        | 1386        | 1481        | 1481        | 3036        | 3134        | 3134        |     |      |      |      |      |      |      |      |      |      |      |      |  |
|                                                     | 747                             | 1027        | 1027        | 1389        | 1466        | 1466        | 3010        | 3121        | 3121        |     |      |      |      |      |      |      |      |      |      |      |      |  |
|                                                     | <i>731</i>                      | <i>1017</i> | <i>1017</i> | <i>1355</i> | <i>1455</i> | <i>1455</i> | <i>2968</i> | <i>3054</i> | <i>3054</i> |     |      |      |      |      |      |      |      |      |      |      |      |  |
| F <sub>3</sub> C- <sup>*</sup> HCClH <sub>2</sub>   | 1715 <i>i</i>                   | 6           | 50          | 88          | 166         | 371         | 469         | 494         | 550         | 709 | 755  | 1047 | 1059 | 1131 | 1208 | 1214 | 1421 | 1440 | 1449 | 3061 | 3160 |  |
|                                                     | 2080 <i>i</i>                   | 10          | 43          | 79          | 166         | 383         | 460         | 483         | 549         | 702 | 785  | 1048 | 1062 | 1139 | 1202 | 1207 | 1418 | 1435 | 1452 | 3039 | 3142 |  |
| F <sub>3</sub> C- <sup>*</sup> ClCH <sub>3</sub>    | 445 <i>i</i>                    | 9           | 76          | 78          | 233         | 234         | 249         | 509         | 511         | 679 | 721  | 722  | 1000 | 1108 | 1258 | 1258 | 1434 | 1434 | 3065 | 3213 | 3214 |  |
|                                                     | 727 <i>i</i>                    | 15          | 81          | 81          | 250         | 250         | 283         | 499         | 499         | 670 | 777  | 777  | 983  | 1169 | 1232 | 1232 | 1431 | 1431 | 3032 | 3188 | 3188 |  |
| <sup>c</sup> H <sub>3</sub> C                       | 449                             | 1404        | 1404        | 3078        | 3249        | 3249        |             |             |             |     |      |      |      |      |      |      |      |      |      |      |      |  |
|                                                     | 374                             | 1415        | 1415        | 3076        | 3263        | 3263        |             |             |             |     |      |      |      |      |      |      |      |      |      |      |      |  |
|                                                     | <i>580</i>                      | <i>1383</i> | <i>1383</i> | <i>3002</i> | <i>3184</i> | <i>3184</i> |             |             |             |     |      |      |      |      |      |      |      |      |      |      |      |  |

<sup>a</sup>Upper values correspond to the optimised frequencies at B3LYP/6-31G(*d*) level of theory. <sup>b</sup>Lower values correspond to the optimised frequencies at MP2/6-31G(*d,p*) level of theory. <sup>c</sup>Ref. 39. <sup>d</sup>Ref. 41.

**TABLE 2S:** Vibrational frequencies computed at the B3LYP/6-31G(*d*) level of theory for reactants, transition structures and products involved in the Cl-transfer reactions:  $F_3C + CCl_{4-n}F_n$  ( $n = 0, 1$  or  $2$ ). Experimental values are given in italics.

| Species                                             | Frequencies (cm <sup>-1</sup> ) |            |              |            |             |             |             |             |             |     |     |     |     |     |     |     |      |      |      |      |      |  |
|-----------------------------------------------------|---------------------------------|------------|--------------|------------|-------------|-------------|-------------|-------------|-------------|-----|-----|-----|-----|-----|-----|-----|------|------|------|------|------|--|
| <sup>a</sup> CCl <sub>2</sub> F <sub>2</sub>        | 259                             | 307        | 409          | 419        | 431         | 641         | 846         | 1115        | 1214        |     |     |     |     |     |     |     |      |      |      |      |      |  |
|                                                     | <i>261</i>                      | <i>322</i> | <i>436</i>   | <i>436</i> | <i>457</i>  | <i>667</i>  | <i>922</i>  | <i>1099</i> | <i>1162</i> |     |     |     |     |     |     |     |      |      |      |      |      |  |
| F <sub>3</sub> C- <sup>*</sup> CICClF <sub>2</sub>  | 393 <i>i</i>                    | 14         | 46           | 53         | 145         | 179         | 195         | 239         | 258         | 376 | 415 | 507 | 509 | 574 | 665 | 743 | 1007 | 1133 | 1236 | 1279 | 1281 |  |
| <sup>b</sup> F <sub>2</sub> CIC                     | 349                             | 398        | 578          | 734        | 1149        | 1236        |             |             |             |     |     |     |     |     |     |     |      |      |      |      |      |  |
|                                                     | -                               | -          | <i>599</i>   | <i>761</i> | <i>1148</i> | -           |             |             |             |     |     |     |     |     |     |     |      |      |      |      |      |  |
| <sup>a</sup> CCl <sub>3</sub> F                     | 239                             | 239        | 340          | 385        | 385         | 511         | 793         | 793         | 1117        |     |     |     |     |     |     |     |      |      |      |      |      |  |
|                                                     | <i>241</i>                      | <i>241</i> | <i>349.5</i> | <i>398</i> | <i>398</i>  | <i>535</i>  | <i>847</i>  | <i>847</i>  | <i>1085</i> |     |     |     |     |     |     |     |      |      |      |      |      |  |
| F <sub>3</sub> C- <sup>*</sup> CICCl <sub>2</sub> F | 388 <i>i</i>                    | 9          | 42           | 48         | 142         | 162         | 179         | 224         | 231         | 308 | 379 | 458 | 505 | 507 | 585 | 696 | 827  | 1007 | 1153 | 1284 | 1285 |  |
| <sup>b</sup> FCl <sub>2</sub> C                     | 275                             | 368        | 451          | 583        | 865         | 1177        |             |             |             |     |     |     |     |     |     |     |      |      |      |      |      |  |
|                                                     | -                               | -          | -            | <i>747</i> | <i>919</i>  | <i>1143</i> |             |             |             |     |     |     |     |     |     |     |      |      |      |      |      |  |
| <sup>a</sup> CCl <sub>4</sub>                       | 214                             | 214        | 309          | 309        | 309         | 442         | 730         | 730         | 730         |     |     |     |     |     |     |     |      |      |      |      |      |  |
|                                                     | <i>218</i>                      | <i>218</i> | <i>314</i>   | <i>314</i> | <i>314</i>  | <i>458</i>  | <i>776</i>  | <i>776</i>  | <i>776</i>  |     |     |     |     |     |     |     |      |      |      |      |      |  |
| F <sub>3</sub> C- <sup>*</sup> CICCl <sub>3</sub>   | 370 <i>i</i>                    | 1          | 41           | 43         | 138         | 154         | 156         | 209         | 210         | 291 | 291 | 379 | 503 | 505 | 518 | 685 | 770  | 772  | 1008 | 1288 | 1289 |  |
| <sup>a</sup> Cl <sub>3</sub> C                      | 269                             | 270        | 326          | 472        | 857         | 858         |             |             |             |     |     |     |     |     |     |     |      |      |      |      |      |  |
|                                                     | <i>240</i>                      | <i>240</i> | <i>450</i>   | <i>460</i> | <i>898</i>  | <i>898</i>  |             |             |             |     |     |     |     |     |     |     |      |      |      |      |      |  |
| <sup>a</sup> CCIF <sub>3</sub>                      | 340                             | 340        | 457          | 551        | 551         | 773         | 1099        | 1264        | 1264        |     |     |     |     |     |     |     |      |      |      |      |      |  |
|                                                     | <i>350</i>                      | <i>350</i> | <i>474</i>   | <i>560</i> | <i>560</i>  | <i>782</i>  | <i>1106</i> | <i>1217</i> | <i>1217</i> |     |     |     |     |     |     |     |      |      |      |      |      |  |

<sup>a</sup>Ref. 40. <sup>b</sup>Ref.41.

**TABLE 3S:** Partition functions ( $Q_T(T)$  translational,  $Q_R(T)$  rotational,  $Q_V(T)$  vibrational,  $Q_E(T)$  electronic,  $Q_{V'}(T)$  vibrational corrected for hindered rotation, and  $Q_{HR}(T)$  hindered rotor,  $T = 298.15$  K), hindered rotational barriers ( $V_o$ , kcal mol<sup>-1</sup>  $T = 298.15$  K) and imaginary frequencies ( $\tilde{\nu}$  cm<sup>-1</sup>), optimised at the <sup>a</sup>B3LYP/6-31G(d) and <sup>b</sup>MP2/6-31G(d,p) levels of theory, for the species involved in H- and Cl-transfer the reactions: F<sub>3</sub>C + CX<sub>4-n</sub>H<sub>n</sub> ( $n = 1, 2$  or  $3$ ; X = F or Cl) and F<sub>3</sub>C + CCl<sub>4-n</sub>F<sub>n</sub> ( $n = 0, 1$  or  $2$ ).

| Species                                | $Q_T(T), 10^{-7}$ | $Q_R(T), 10^{-3}$ | $Q_V(T)$ | $Q_E(T)$ | $Q_{V'}(T)$ | $Q_{HR}(T)$ | $V_o$ | $\tilde{\nu}$ |
|----------------------------------------|-------------------|-------------------|----------|----------|-------------|-------------|-------|---------------|
| F <sub>3</sub> C <sup>a</sup>          | 2.25              | 11.50             | 1.28     | 2.00     |             |             |       |               |
|                                        | 2.25              | 11.50             | 1.30     | 2.00     |             |             |       |               |
| CF <sub>3</sub> H                      | 2.30              | 11.90             | 1.29     | 1.00     |             |             |       |               |
|                                        | 2.30              | 12.00             | 1.30     | 1.00     |             |             |       |               |
| F <sub>3</sub> C-*HCF <sub>3</sub>     | 6.43              | 512.00            |          | 2.00     | 335.00      | 41.43       | 2.38  | 1708i         |
|                                        | 6.43              | 502.00            |          | 2.00     | 436.00      | 53.00       | 3.50  | 2116i         |
| CF <sub>2</sub> H <sub>2</sub>         | 1.47              | 6.29              | 1.11     | 1.00     |             |             |       |               |
|                                        | 1.47              | 6.32              | 1.12     | 1.00     |             |             |       |               |
| F <sub>3</sub> C-*HCF <sub>2</sub> H   | 5.23              | 380.00            |          | 2.00     | 142.00      | 36.68       | 1.39  | 1721i         |
|                                        | 5.23              | 354.00            |          | 2.00     | 126.00      | 48.00       | 3.11  | 2154i         |
| CFH <sub>3</sub>                       | 0.78              | 0.90              | 1.02     | 1.00     |             |             |       |               |
|                                        | 0.78              | 0.90              | 1.02     | 1.00     |             |             |       |               |
| F <sub>3</sub> C-*HCFH <sub>2</sub>    | 4.10              | 249.00            |          | 2.00     | 46.50       | 23.54       | 0.81  | 1766i         |
|                                        | 4.10              | 223.00            |          | 2.00     | 35.70       | 32.60       | 2.15  | 2193i         |
| CCl <sub>3</sub> H                     | 5.03              | 70.20             | 2.69     | 1.00     |             |             |       |               |
|                                        | 5.03              | 67.60             | 2.55     | 1.00     |             |             |       |               |
| F <sub>3</sub> C-*HCCl <sub>3</sub>    | 10.00             | 1110.00           |          | 2.00     | 462.00      | 51.80       | 0.26  | 1650i         |
|                                        | 10.00             | 1070.00           |          | 2.00     | 351.00      | 51.70       | 1.22  | 1973i         |
| F <sub>3</sub> C-*ClCCl <sub>2</sub> H | 10.00             | 1360.00           |          | 4.03     | 415.00      | 47.16       | 0.52  | 407i          |
| CCl <sub>2</sub> H <sub>2</sub>        | 3.02              | 24.90             | 1.45     | 1.00     |             |             |       |               |
|                                        | 3.02              | 23.90             | 1.44     | 1.00     |             |             |       |               |
| F <sub>3</sub> C-*HCCl <sub>2</sub> H  | 7.43              | 736.00            |          | 2.00     | 137.00      | 47.76       | 0.25  | 1700i         |
|                                        | 7.43              | 708.00            |          | 2.00     | 178.00      | 47.60       | 0.25  | 2048i         |
| F <sub>3</sub> C-*ClCClH <sub>2</sub>  | 7.43              | 706.00            |          | 4.03     | 119.00      | 29.74       | 1.25  | 431i          |
|                                        | 7.43              | 661.00            |          | 4.03     | 89.70       | 29.90       | 0.49  | 729i          |
| CClH <sub>3</sub>                      | 1.39              | 1.77              | 1.05     | 1.00     |             |             |       |               |
|                                        | 1.39              | 1.71              | 1.05     | 1.00     |             |             |       |               |
| F <sub>3</sub> C-*HCClH <sub>2</sub>   | 5.10              | 366.00            |          | 2.00     | 41.80       | 30.67       | 0.15  | 1715i         |
|                                        | 5.10              | 355.00            |          | 2.00     | 52.80       | 30.50       | 0.09  | 2080i         |
| F <sub>3</sub> C-*ClCH <sub>3</sub>    | 5.10              | 275.00            |          | 4.03     | 437.00      | 11.32       | 0.05  | 445i          |
|                                        | 5.10              | 263.00            |          | 4.03     | 363.00      | 11.20       | 0.13  | 727i          |
| CCl <sub>2</sub> F <sub>2</sub>        | 5.16              | 91.10             | 2.96     | 1.00     |             |             |       |               |
| F <sub>3</sub> C-*ClCClF <sub>2</sub>  | 10.20             | 1250.00           |          | 4.03     | 495.00      | 45.84       | 1.90  | 393i          |
| CCl <sub>3</sub> F                     | 6.22              | 93.00             | 4.26     | 1.00     |             |             |       |               |
| F <sub>3</sub> C-*ClCCl <sub>2</sub> F | 11.50             | 1610.00           |          | 4.03     | 899.00      | 48.92       | 0.79  | 388i          |
| CCl <sub>4</sub>                       | 7.35              | 33.00             | 6.40     | 1.00     |             |             |       |               |
| F <sub>3</sub> C-*ClCCl <sub>3</sub>   | 12.90             | 2000.00           |          | 4.03     | 1620.00     | 52.13       | 0.02  | 370i          |

<sup>a</sup>Upper values correspond to those optimised at the B3LYP/6-31G(d) level of theory. <sup>b</sup>Lower values correspond to those optimised at MP2/6-31G(d,p) level of theory.

**TABLE 4S:** Electronic charge distribution on reactants and transition structures, polarity variation,  $\Delta p_{C-X}$  (X = H or Cl),  $L$  parameter and reaction enthalpies,  $\Delta_r H_{298.15\text{ K}}$  (kcal mol<sup>-1</sup>) for the reactions:  $F_3C + CX_{4-n}H_n$  ( $n = 1, 2$  or  $3$ ; X = F or Cl) and  $F_3C + CCl_{4-n}F_n$  ( $n = 0, 1$  or  $2$ ).

| Species                                             |      | NPA   |       | $L$   | $\Delta_r H_{298.15\text{ K}}$ |                |                |
|-----------------------------------------------------|------|-------|-------|-------|--------------------------------|----------------|----------------|
|                                                     |      | $q_C$ | $q_H$ |       | $q_{Cl}$                       | B3LYP/6-31G(d) | MP2/6-31G(d,p) |
| CF <sub>3</sub> H                                   |      | 0.97  | 0.16  |       |                                |                |                |
| F <sub>3</sub> C- <sup>*</sup> HCF <sub>3</sub>     |      | 1.02  | 0.00  |       |                                |                |                |
| $\Delta p_{C-H}$                                    | 0.21 |       |       | 1.000 | 0.00                           | 0.00           | 0.00           |
| CF <sub>2</sub> H <sub>2</sub>                      |      | 0.45  | 0.16  |       |                                |                |                |
| F <sub>3</sub> C- <sup>*</sup> HCF <sub>2</sub> H   |      | 0.52  | 0.10  |       |                                |                |                |
| $\Delta p_{C-H}$                                    | 0.13 |       |       | 0.755 | -4.73                          | -5.04          | -3.59          |
| CFH <sub>3</sub>                                    |      | -0.17 | 0.18  |       |                                |                |                |
| F <sub>3</sub> C- <sup>*</sup> HCFH <sub>2</sub>    |      | -0.28 | 0.11  |       |                                |                |                |
| $\Delta p_{C-H}$                                    | 0.03 |       |       | 0.742 | -5.07                          | -5.18          | -3.65          |
| CCl <sub>3</sub> H                                  |      | -0.34 | 0.28  | 0.02  |                                |                |                |
| F <sub>3</sub> C- <sup>*</sup> HCCl <sub>3</sub>    |      | -0.01 | 0.06  | 0.04  |                                |                |                |
| $\Delta p_{C-H}$                                    | 0.55 |       |       | 0.595 | -11.45                         | -11.44         | -10.54         |
| F <sub>3</sub> C- <sup>*</sup> CICCl <sub>2</sub> H |      | -0.03 | 0.14  | -0.09 |                                |                |                |
| $\Delta p_{C-Cl}$                                   | 0.42 |       |       | 0.621 | -14.45                         | -              | -8.44          |
| CCl <sub>2</sub> H <sub>2</sub>                     |      | -0.46 | 0.26  | -0.03 |                                |                |                |
| F <sub>3</sub> C- <sup>*</sup> HCCl <sub>2</sub> H  |      | -0.02 | 0.05  | 0.01  |                                |                |                |
| $\Delta p_{C-H}$                                    | 0.66 |       |       | 0.682 | -8.46                          | -9.21          | -7.27          |
| F <sub>3</sub> C- <sup>*</sup> CICClH <sub>2</sub>  |      | -0.01 | 0.12  | -0.11 |                                |                |                |
| $\Delta p_{C-Cl}$                                   | 0.54 |       |       | 0.816 | -9.17                          | -              | -6.07          |
| CClH <sub>3</sub>                                   |      | -0.65 | 0.24  | -0.08 |                                |                |                |
| F <sub>3</sub> C- <sup>*</sup> HCClH <sub>2</sub>   |      | -0.03 | 0.04  | -0.02 |                                |                |                |
| $\Delta p_{C-H}$                                    | 0.82 |       |       | 0.819 | -5.90                          | -6.61          | -5.90          |
| F <sub>3</sub> C- <sup>*</sup> CICH <sub>3</sub>    |      | 0.01  | 0.23  | -0.11 |                                |                |                |
| $\Delta p_{C-Cl}$                                   | 0.69 |       |       | 1.088 | -3.24                          | -              | -2.38          |
| CCl <sub>2</sub> F <sub>2</sub>                     |      | 0.67  |       | 0.00  |                                |                |                |
| F <sub>3</sub> C- <sup>*</sup> CICClF <sub>2</sub>  |      | 0.51  |       | -0.10 |                                |                |                |
| $\Delta p_{C-Cl}$                                   | 0.07 |       |       | 0.846 | -6.73                          | -              | -3.60          |
| CCl <sub>3</sub> F                                  |      | 0.22  |       | 0.04  |                                |                |                |
| F <sub>3</sub> C- <sup>*</sup> CICCl <sub>2</sub> F |      | 0.24  |       | -0.08 |                                |                |                |
| $\Delta p_{C-Cl}$                                   | 0.14 |       |       | 0.594 | -13.49                         | -              | -13.00         |
| CCl <sub>4</sub>                                    |      | -0.26 |       | 0.07  |                                |                |                |
| F <sub>3</sub> C- <sup>*</sup> CICCl <sub>3</sub>   |      | -0.05 |       | -0.05 |                                |                |                |
| $\Delta p_{C-Cl}$                                   | 0.32 |       |       | 0.477 | -21.16                         | -              | -15.30         |

<sup>a</sup>Ref. 39.
